# Supplementary material for: PCR-Free Enrichment of Mitochondrial DNA from Human Blood and Cell Lines for High Quality Next-Generation DNA Sequencing
Source: PubMed Central journal article supplement (PMC4619561; doi:10.1371/journal.pone.0139253), 2015-10-21
Supplement: pone.0139253.s002.pdf [file pone.0139253.s002.pdf]

**S2. Table Estimated mitochondrial copy number from human gDNA using qPCR.**

|                                             | <i>(MT-ND1)-RPPH1</i> ( $2^{-\Delta Ct}$ ) |          |                 |          |
|---------------------------------------------|--------------------------------------------|----------|-----------------|----------|
|                                             | Pooled gDNA                                |          | 1312 PBMCs gDNA |          |
| Nuclear copy number expected from dilution* | Mean                                       | (s.d.)   | Mean            | (s.d.)   |
| 100                                         | 352.67                                     | (87.74)  | 301.97          | (130.18) |
| 1000                                        | 382.97                                     | (66.59)  | 399.61          | (76.07)  |
| 10000                                       | 343.81                                     | (39.08)  | 498.44          | (147.50) |
| 100000                                      | 240.02                                     | (110.07) | 281.08          | (48.14)  |
|                                             | <b>Average</b>                             | 329.87   | 370.28          |          |

\* [http://www3.appliedbiosystems.com/cms/groups/mcb\\_marketing/documents/generaldocuments/cms\\_042486.pdf](http://www3.appliedbiosystems.com/cms/groups/mcb_marketing/documents/generaldocuments/cms_042486.pdf)
